# Supplementary material for: Position‐Scanning Peptide Libraries as Particle Immunogens for Improving CD8+ T‐Cell Responses
Source: PubMed Central journal article supplement (PMC8693074; doi:10.1002/advs.202103023), 2021-10-30
Supplement: ADVS-8-2103023-s001.pdf [file ADVS-8-2103023-s001.pdf]

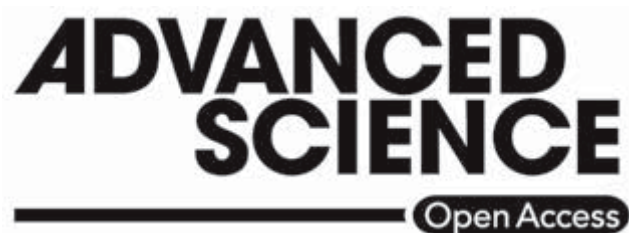

## Supporting Information

for *Adv. Sci.*, DOI: 10.1002/adv.202103023

Position-Scanning Peptide Libraries as Particle Immunogens for  
Improving CD8+ T Cell Responses

*Xuedan He<sup>1</sup>, Shiqi Zhou<sup>1</sup>, Breandan Quinn<sup>1</sup>, Weichiao Huang<sup>1</sup>,  
Dushyant Jahagirdar<sup>2</sup>, Michael Vega<sup>3</sup>, Joaquin Ortega<sup>2</sup>, Mark D. Long<sup>4</sup>,  
Fumito Ito<sup>5</sup>, Scott I. Abrams<sup>5</sup>, Jonathan F. Lovell<sup>1\*</sup>*

**Supporting Information: Position-Scanning Peptide Libraries as Particle Immunogens for Improving CD8<sup>+</sup> T Cell Responses**

Xuedan He<sup>1</sup>, Shiqi Zhou<sup>1</sup>, Breandan Quinn<sup>1</sup>, Weichiao Huang<sup>1</sup>, Dushyant Jahagirdar<sup>2</sup>, Michael Vega<sup>3</sup>, Joaquin Ortega<sup>2</sup>, Mark D. Long<sup>4</sup>, Fumito Ito<sup>5</sup>, Scott I. Abrams<sup>5</sup>, Jonathan F. Lovell<sup>1\*</sup>

<sup>1</sup> University at Buffalo, State University of New York, Buffalo, NY, 14260, USA

<sup>2</sup> Department of Anatomy and Cell Biology, McGill University Montreal, Quebec, Canada

<sup>3</sup> Division of Research and Innovation Partnerships, Northern Illinois University, DeKalb, IL 60115, USA

<sup>4</sup> Department of Cancer Genetics and Genomics, Roswell Park Comprehensive Cancer Center (RPCCC), Buffalo, NY 14263, USA

<sup>5</sup> Department of Immunology, Roswell Park Comprehensive Cancer Center, Buffalo, NY, 14263, USA

\*E-mail: jflovell@buffalo.edu

**Methods**

Liposome preparation: First, CoPoP/PHAD liposomes were prepared with a [DOPC: Chol: PHAD: CoPoP] mass ratio of 20:5:1:0.4. Dry lipids were dissolved in 1 mL ethanol at 50 °C for 10 min and samples were sonicated for 5 seconds to break up large particles. 4 mL of PBS was added to the liposome solution and incubated for another 10 min. The liposome mixture was subjected to nitrogen pressurized liposome extrusion (Northern Lipids), which was preheated to 50 °C. The pressure of the extruder was around 200 PSI and the membrane stack consisted of 200, 100 and 80 nm filters. Solutions were extruded for 15 times then dialyzed in PBS for at least 4-6 hr at 4 °C two times to remove ethanol. To prepare CoPoP/PHAD/QS21 (CPQ) liposomes, QS21 was added to the CoPoP/PHAD (CP) liposomes overnight.

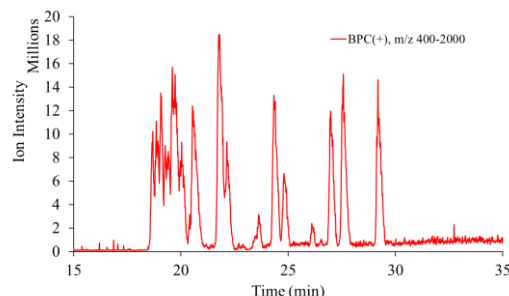

**Figure S1. LC-MS of Env<sub>37-44</sub>-Pos5 positional library.** 4 mg mL<sup>-1</sup> positional peptide libraries were injected to SunFire C8 50x2.1mm (Waters) column. Shimadzu Nexera XR UHPLC system and MS instrument Shimadzu LCMS-8045 triple quadrupole with ESI ionization and Q3 scan, monitoring at m/z 400-2000 were used.

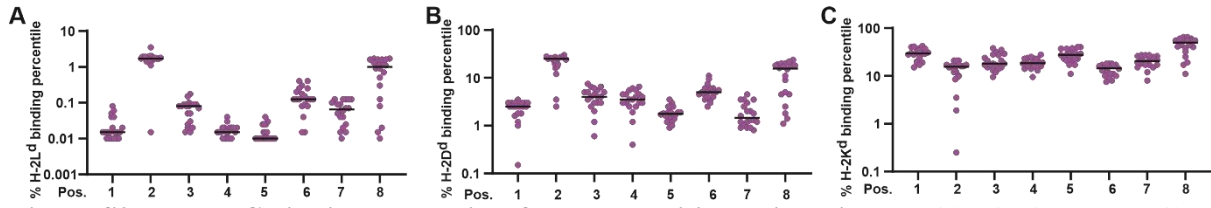

**Figure S2. NetMHC binding percentile of Env<sub>37-44</sub> positional libraries.** Peptide binding percentile to (A) H-2L<sup>d</sup>, (B) H-2D<sup>d</sup> and (C) H-2K<sup>d</sup>.

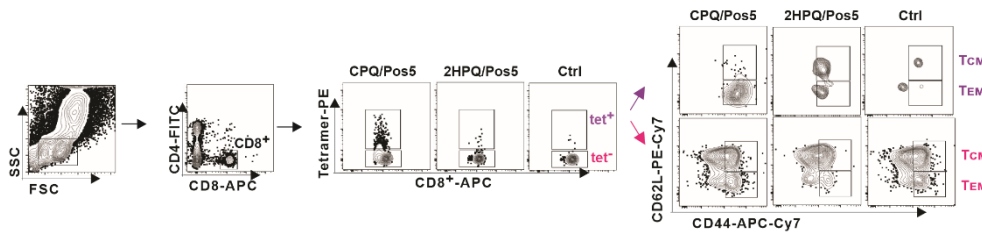

**Figure S3. Flow cytometry gating of Env<sub>37-44</sub> tet<sup>+</sup> in CD8<sup>+</sup> T cells, T<sub>EM</sub> (CD62L<sup>-</sup> CD44<sup>+</sup>) and T<sub>CM</sub> (CD62L<sup>+</sup> CD44<sup>+</sup>) cells in the tet<sup>+</sup> or tet<sup>-</sup> T cells.** Cells were first gated by CD8<sup>+</sup>CD4<sup>-</sup>. Env<sub>37-44</sub> tet<sup>+</sup> T cells and Env<sub>37-44</sub> tet<sup>-</sup> T cells were gated, then T<sub>EM</sub> and T<sub>CM</sub> in tet<sup>+</sup>CD8<sup>+</sup> T cells and tet<sup>-</sup>CD8<sup>+</sup> T cells were gated. Representative plots are shown from experiments with n=5 mice.

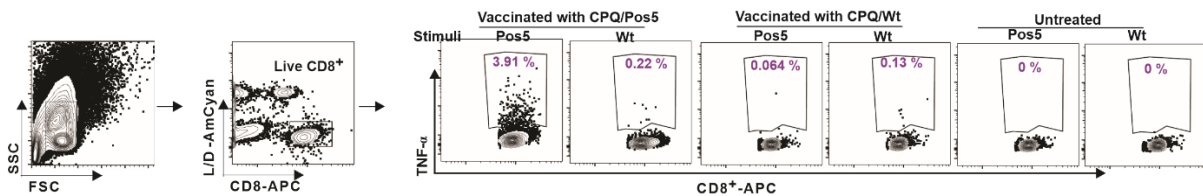

**Figure S4. Flow cytometry gating of TNF- $\alpha$  producing CD8<sup>+</sup> T cells in spleen.** Cells were first gated by CD8<sup>+</sup> L/D<sup>-</sup> then TNF- $\alpha$  producing CD8<sup>+</sup> T cells. Representative plots are shown from experiments with n=3 mice.

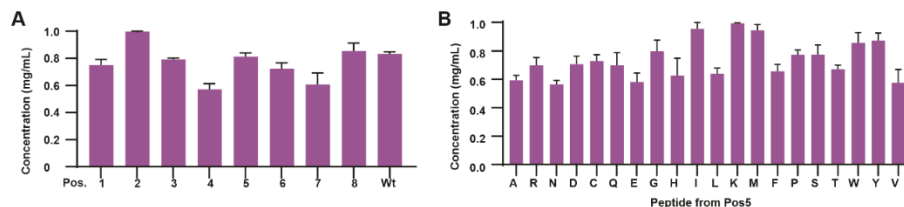

**Figure S5. Concentration of stock peptide and peptide libraries measured by BCA assay.** 1mg peptide powder was aliquoted to vials by Genscript, peptide libraries were directly dissolved in 1mL H<sub>2</sub>O with concentration 1mg mL<sup>-1</sup>. BCA assay was used to test the peptide concentration by comparing to a bovine serum albumin (BSA) standard curve. The concentration of peptide and peptide libraries varies from 0.6-1mg mL<sup>-1</sup>. Since we assumed the concentration of peptides and peptide libraries were 1mg mL<sup>-1</sup> when we prepared the vaccine, the actual vaccinated antigen dose might vary from 60-100% of the desired dose. Error bars show mean  $\pm$  std. dev. for n=3 triplicate experiments.

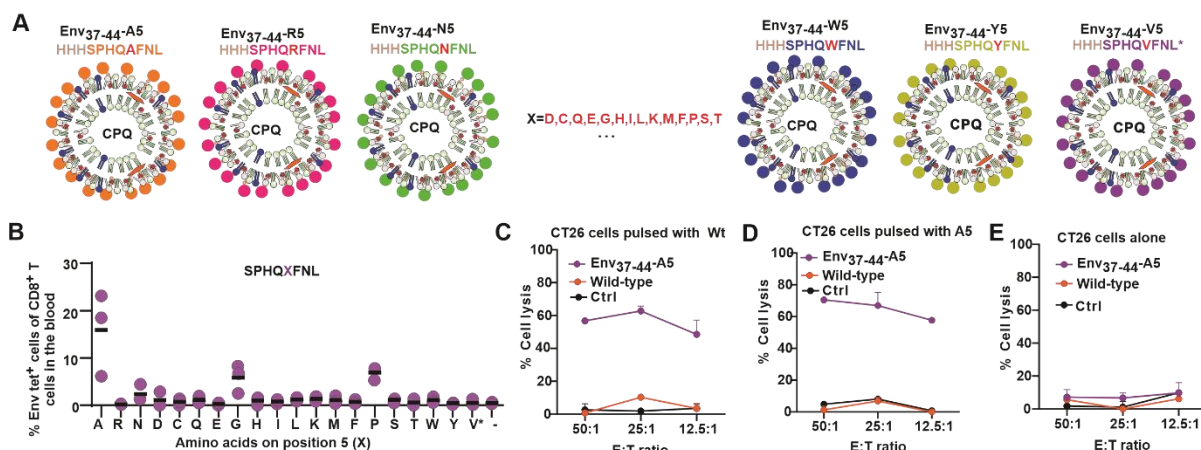

**Figure S6. Interrogating the Env<sub>37-44</sub>-Pos5 library identifies alanine substitution at position 5 of Env<sub>37-44</sub> as an enhanced mimotope (“e-mimotope”).** A) Scheme of using single peptide mimotope from Env<sub>37-44</sub>-Pos5 as vaccine immunogen. BALB/c mice were vaccinated on day 0 & 7; blood was collected on day 14. Percentage of Env<sub>37-44</sub> tet<sup>+</sup> cells (B) in CD8<sup>+</sup> T cell population in blood. CT26 tumor cells with Env<sub>37-44</sub> (C) or Env<sub>37-44</sub>-A5 (D) pulse or without pulse (E) were served as target cells (T), splenocytes from untreated mice or mice vaccinated with CPQ/Env<sub>37-44</sub>-A5 or CPQ/Env<sub>37-44</sub> were stimulated with antigens and IL-2 then served as effector cells. Effector cells were incubated with target cells for 5 hours with an indicated E:T ratio. Error bars show mean  $\pm$  std. dev. for n=3 per group.

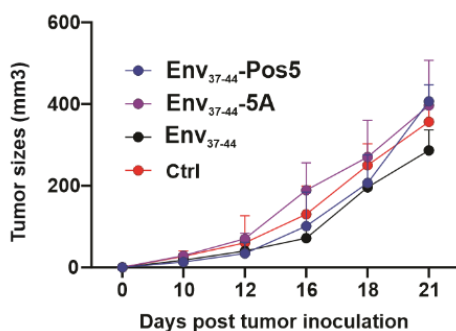

**Figure S7. Either CPQ/Env<sub>37-44</sub> -Pos5 or CPQ/ Env<sub>37-44</sub> -5A delayed tumor growth in BALB/c mice.** BALB/c mice were vaccinated on day 0 and day 7 and then inoculated with CT26 cells subcutaneously. Error bars show mean  $\pm$  std. dev. for n=5 mice per group.

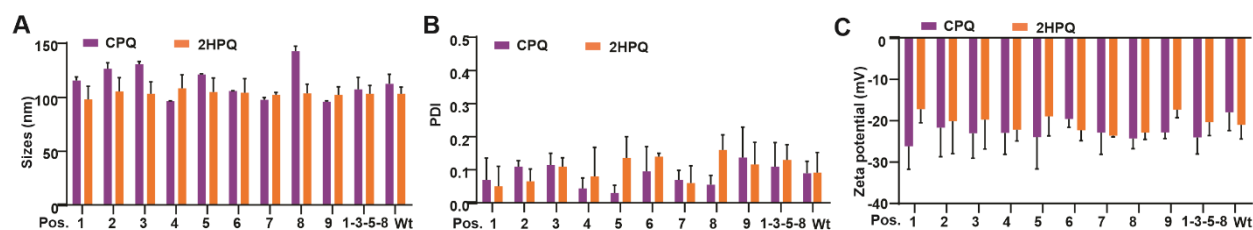

**Figure S8. AH1 positional libraries formed nano particles with CPQ liposomes.** Sizes (A), polydispersity (B) and zeta potential (C) of CPQ and 2HPQ liposomes after AH1 positional libraries and wild-type peptide binding. Error bars show mean  $\pm$  std. dev. for n=3 triplicate experiments.

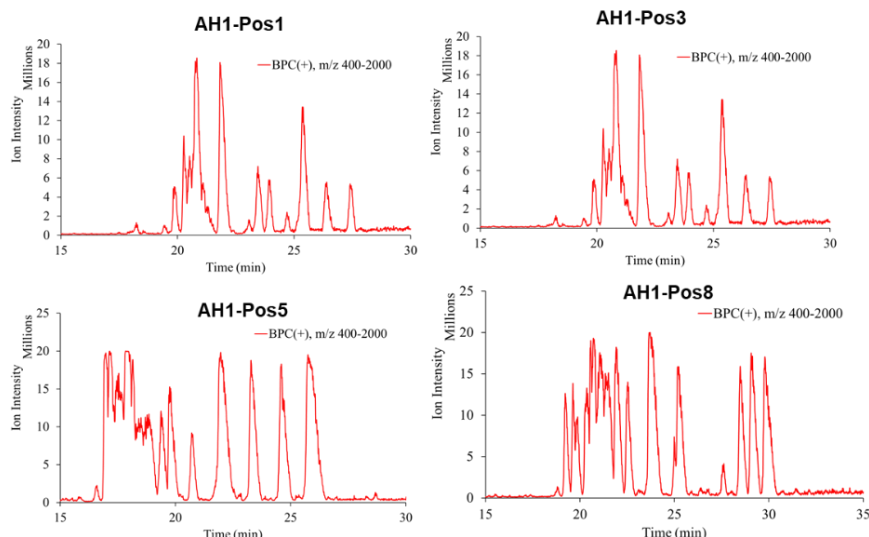

**Figure S9. LC-MS of AH1 positional libraries.** 4 mg mL<sup>-1</sup> positional peptide libraries were injected to SunFire C8 50x2.1mm (Waters) column. Shimadzu Nexera XR UHPLC system and MS instrument Shimadzu LCMS-8045 triple quadrupole with ESI ionization and Q3 scan, monitoring at m/z 400-2000 were used.

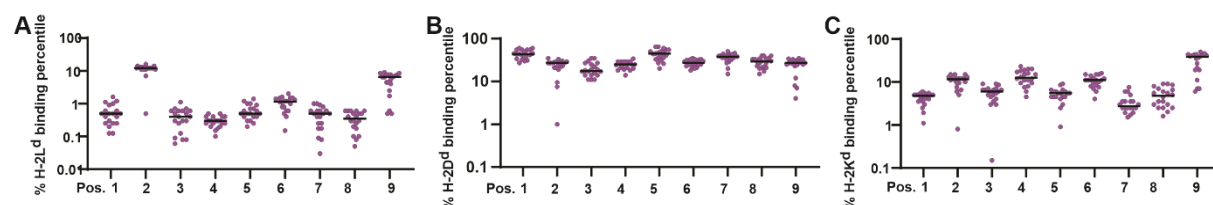

**Figure S10. NetMHC binding percentile of AH1 positional libraries.** Peptide binding percentile to (A) H-2L<sup>d</sup>, (B) H-2D<sup>d</sup> and (C) H-2K<sup>d</sup>.

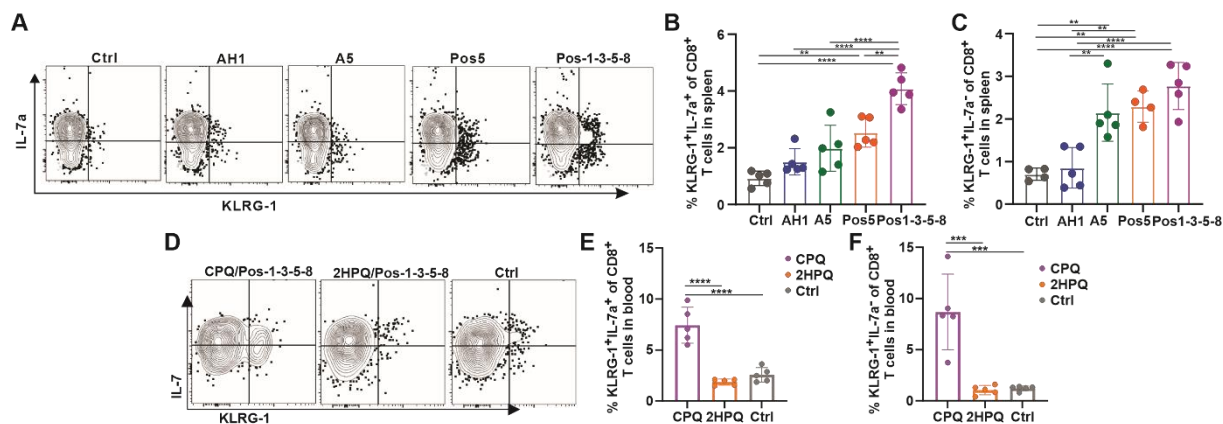

**Figure S11.** BALB/c mice were inoculated with CT26 cells subcutaneously on day 0 and then untreated or injected with vaccine on days 8 & 15. Splenocytes were collected on day 23. Flow cytometry gating (A) and percentage of KLRG-1<sup>+</sup>IL7-a<sup>+</sup> (B) and KLRG-1<sup>+</sup>IL7-a<sup>-</sup> cells (C) in CD8<sup>+</sup> T cell population. BALB/c mice were inoculated with CT26 cells subcutaneously on day 0; then the vaccine was given 12&19 days post-tumor inoculation. Blood was collected on day 26. Flow cytometry gating (D) and percentage of KLRG-1<sup>+</sup>IL7-a<sup>+</sup> (E) and KLRG-1<sup>+</sup>IL7-a<sup>-</sup> cells (F) in CD8<sup>+</sup> T cell population. Error bars show mean  $\pm$  std. dev. for n=5 mice. \*\*  $p < 0.01$ , \*\*\*  $p < 0.001$ , and \*\*\*\*  $p < 0.0001$ , analyzed one-way ANOVA with Bonferroni multiple comparisons post-test.

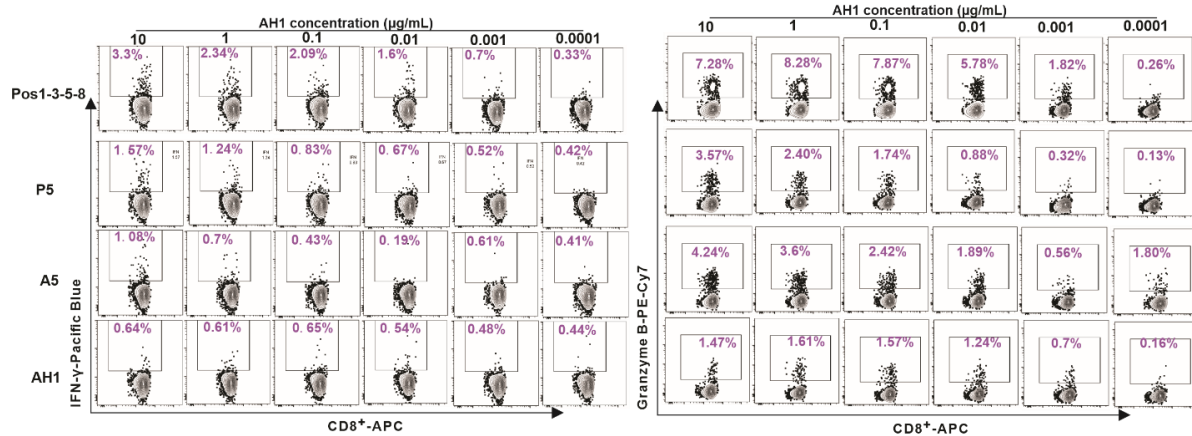

**Figure S12. Flow cytometry gating of IFN- $\gamma$ -producing cells and granzyme B-producing cells in the CD8<sup>+</sup> T cell population.** BALB/c mice were inoculated with CT26 cells subcutaneously on day 0 and then untreated or injected with vaccine on days 8 &15. Splenocytes were collected on day 23 and stimulated with different concentrations of the wild-type AH1 peptide, followed by analysis of IFN- $\gamma$  and granzyme B expression by intracellular staining. Representative plots are shown from experiments with n=5 mice.

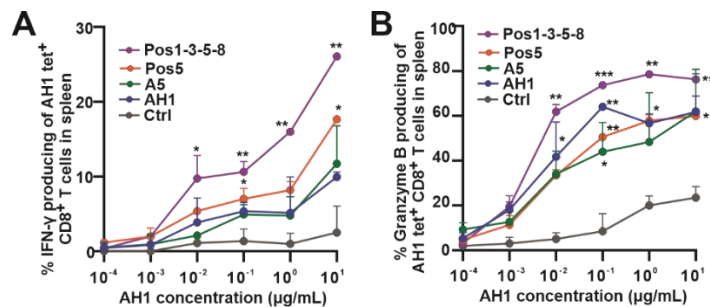

**Figure S13. A greater frequency of AH1-specific CD8<sup>+</sup> T cells generated by the positional library vaccine produced cytokines compared to single e-mimotope vaccine.** BALB/c mice were inoculated with CT26 cells subcutaneously on day 0 and then remained untreated or injected with vaccine on days 8 & 15. Splenocytes were collected on day 23 and stimulated with different concentrations of the wild-type AH1 peptide, followed by analysis of IFN- $\gamma$  and granzyme B expression by intracellular staining. Percentage of IFN- $\gamma$ -producing cells (**A**) and granzyme B-producing cells (**B**) in the AH1-tet<sup>+</sup>CD8<sup>+</sup> T cell population. \*  $p < 0.05$ , \*\*  $p < 0.01$ , and \*\*\*  $p < 0.001$  analyzed by one-way ANOVA with Dunnett comparisons post-test. Error bars show mean  $\pm$  std. dev. for n=5 mice. Asterisks indicate statistically significant differences between indicated group and control group with indicated AH1 concentration.



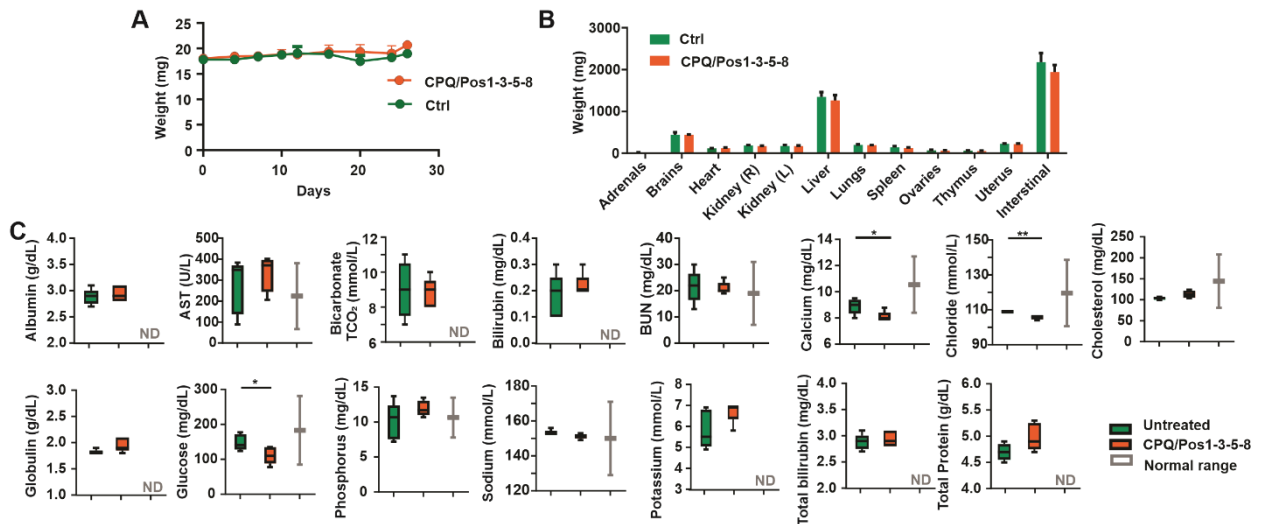

**Figure S14. Safety of CPQ/Pos1-3-5-8 vaccine.** BALB/c mice were inoculated with CT26 cells subcutaneously on day 0; then vaccine was given 12&19 days post-tumor inoculation, blood and organs were collected 26 days post-tumor inoculation. **A)** Weight of mice. **B)** Weight of organs from mice. **C)** Serum markers with their general description as follows: albumin, AST (aspartate aminotransferase), bicarbonate, bilirubin, BUN (blood urea nitrogen), calcium, chloride, cholesterol, globulin, glucose, phosphorus, sodium, potassium, total bilirubin, total protein. Values show mean +/- std. dev for n=5 mice per group. “ND”; no data provided for normal range. Data show box-and-whiskers plots, the line represents the median, the whiskers show the data range and the box shows the interquartile range. \*  $p < 0.05$ , \*\*  $p < 0.01$ , analyzed by two-tailed unpaired Student’s *t*-test.

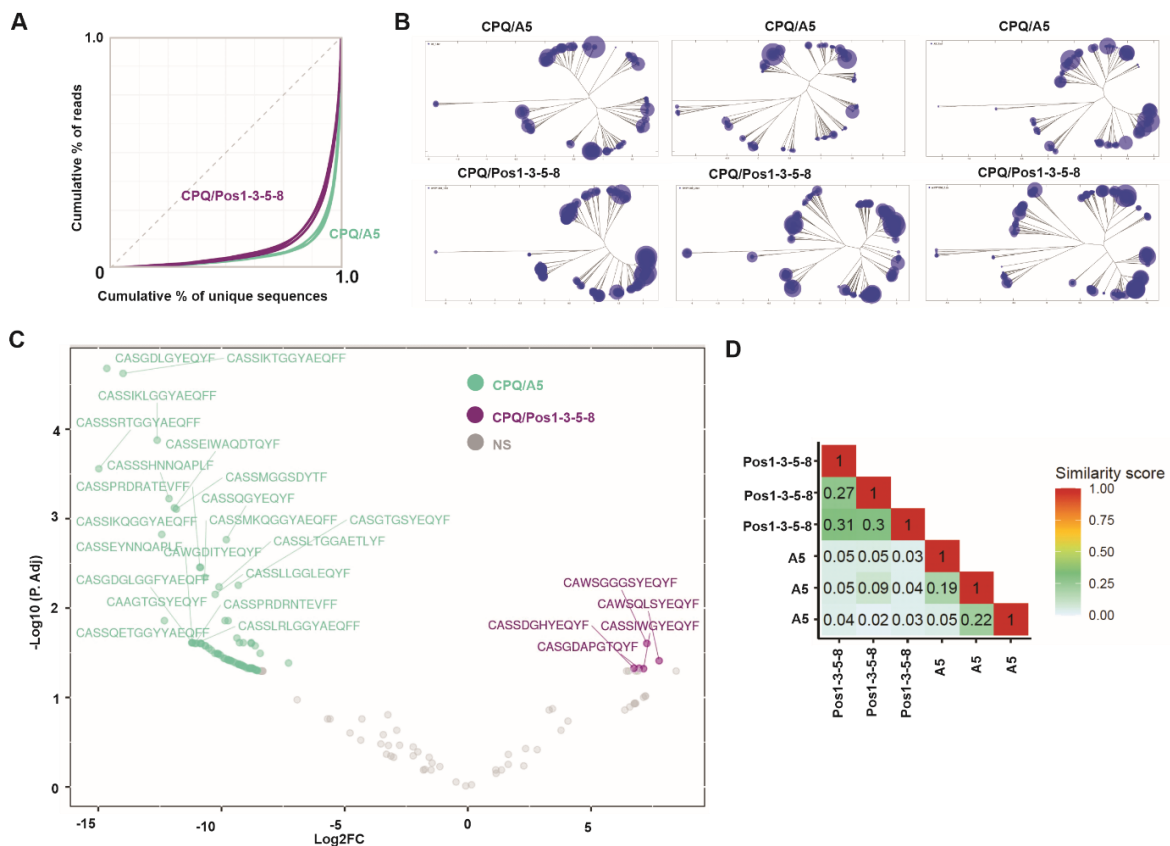

**Figure S15. Effective vaccine therapy induces expansion of highly diverse tumor-specific CD8<sup>+</sup> T cell repertoires.** Mice were vaccinated with CPQ/A5 or CPQ/Pos1-3-5-8 on day 0 & 7, tet<sup>+</sup>CD8<sup>+</sup> T cells were sorted from splenocytes on day 14, DNA were extracted for ImmunoSEQ immune profiling system at the survey level. **A)** Lorenz curve of CPQ/A5 and

CPQ/Pos1-3-5-8. **B**) ImmunoMAP analyses of tet<sup>+</sup>CD8<sup>+</sup> T cells from CPQ/A5 and CPQ/Pos1-3-5-8 vaccinated mice. **C**) Volcano plot depicting differentially abundant clonotypes observed from CPQ/A5 and CPQ/Pos1-3-5-8 vaccinated mice. **D**) Similarity matrix of TCR repertoires from tet<sup>+</sup>CD8<sup>+</sup> T cells from CPQ/A5 and CPQ/Pos1-3-5-8 vaccinated mice.

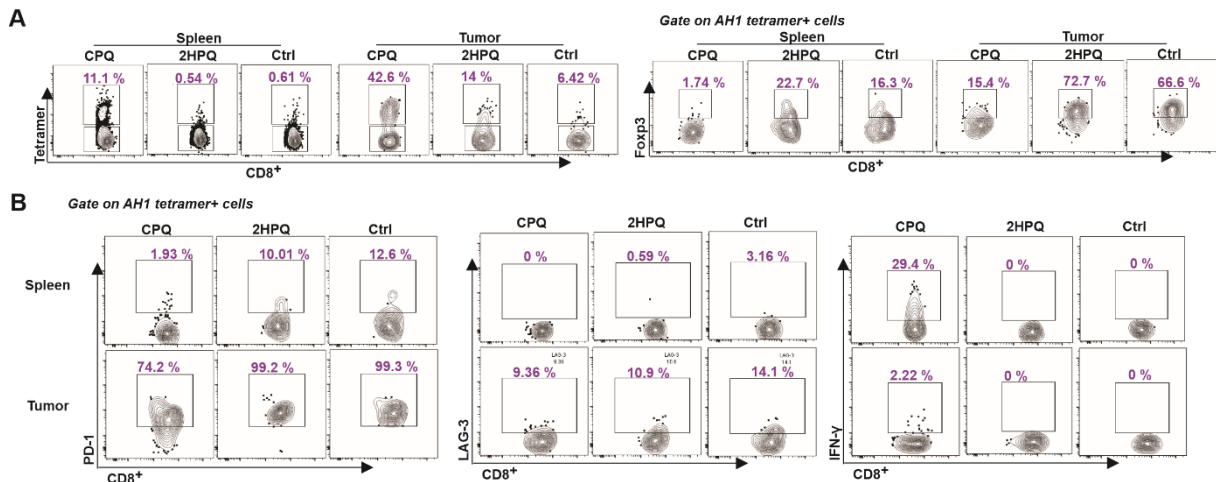

**Figure S16. Flow cytometry gating of Treg (Foxp3<sup>+</sup>) and PD-1<sup>+</sup>, LAG3<sup>+</sup>, IFN-γ<sup>+</sup> T cells in the AH1 tet<sup>+</sup> T cell population.** BALB/c mice were inoculated with CT26 cells subcutaneously on day 0; then vaccine was given 12&19 days post-tumor inoculation, spleen and tumor tissue were collected 26 days post- tumor inoculation for CD8<sup>+</sup> T cell analysis. **A**) Flow cytometry gating of AH1 tet<sup>+</sup> cells in the CD8<sup>+</sup> T cell population (left), foxp3<sup>+</sup> cells in the tet<sup>+</sup>CD8<sup>+</sup> T cell population. **B**) flow cytometry gating of PD-1<sup>+</sup>, LAG-3<sup>+</sup> or IFN-γ<sup>+</sup> cells within the tet<sup>+</sup>CD8<sup>+</sup> T cells. Representative plots are shown from experiments with n=5 mice.

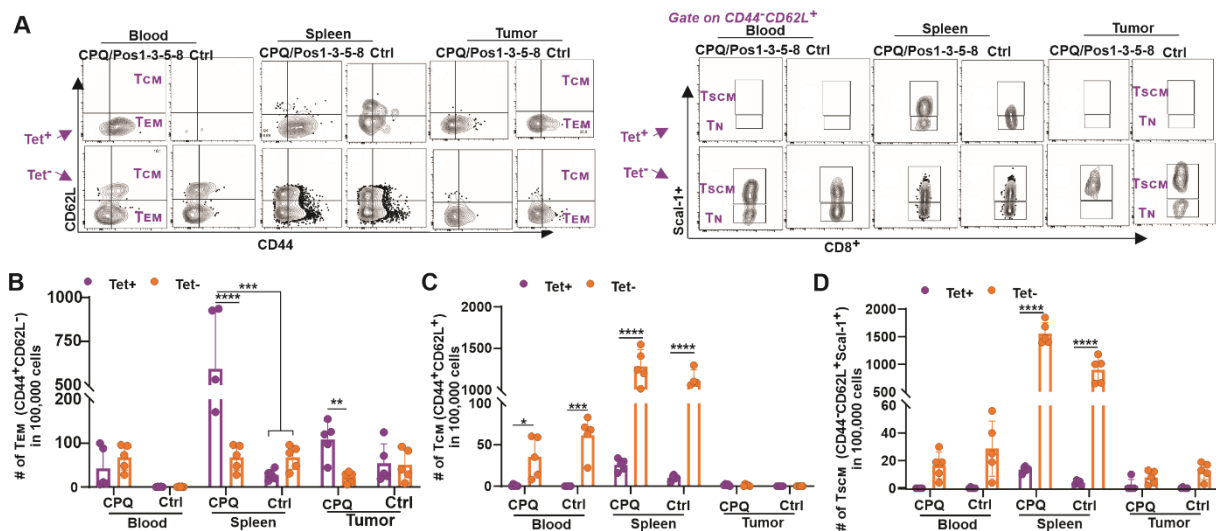

**Figure S17. Memory T cell phenotyping.** BALB/c mice were inoculated with CT26 cells subcutaneously on day 0; then vaccine was given 12&19 days post-tumor inoculation, blood, spleen and tumor were collected 26 days post- tumor inoculation for CD8<sup>+</sup> T cell analysis. **A**) Flow cytometry gating of T<sub>EM</sub> (CD44<sup>+</sup>CD62L<sup>-</sup>), T<sub>CM</sub>(CD44<sup>+</sup>CD62L<sup>+</sup>) cells and T<sub>SCM</sub> (CD44<sup>-</sup>CD62L<sup>+</sup>Scal-1<sup>+</sup>) in the tet<sup>+</sup> CD8<sup>+</sup> or tet<sup>-</sup> CD8<sup>+</sup> T cell population. Number of T<sub>EM</sub> (**B**), T<sub>CM</sub> (**C**) and T<sub>SCM</sub> (**D**) in 100,000 cells in blood, spleen and tumor. \*\* *p* < 0.01, and \*\*\* *p* < 0.001 and \*\*\*\* *p* < 0.0001, analyzed by one-way ANOVA with Tukey multiple comparisons post-test. Representative plots are shown from experiments with n=5 mice.



Table S1. LC-MS of positional libraries

| Positional library        | Peak Time Start (min) | m/z (charge)                  | X=   | Theoretical mass | Peak areas  |
|---------------------------|-----------------------|-------------------------------|------|------------------|-------------|
| En <sub>37-44</sub> -Pos5 | 18.562                | 1382 (1+), 692 (2+), 461 (3+) | K    | 1381             | 63908023    |
| En <sub>37-44</sub> -Pos5 | 18.782                | 1368 (1+), 684 (2+), 457 (3+) | N    | 1367             | 91034033    |
| En <sub>37-44</sub> -Pos5 | 18.97                 | 1391 (1+), 696 (2+), 464 (3+) | H    | 1390             | 127962133   |
| En <sub>37-44</sub> -Pos5 | 19.211                | 1341 (1+), 671 (2+), 448 (3+) | S    | 1340             | 107267716   |
| En <sub>37-44</sub> -Pos5 | 19.211                | 1382 (1+), 691 (2+), 461 (3+) | Q    | 1381             | 47631223    |
| En <sub>37-44</sub> -Pos5 | 19.211                | 1410 (1+), 706 (2+), 471 (3+) | R    | 1409             | 67355896    |
| En <sub>37-44</sub> -Pos5 | 19.538                | 1311 (1+), 656 (2+), 438 (3+) | G    | 1310             | 163288336   |
| En <sub>37-44</sub> -Pos5 | 19.538                | 1369 (1+), 685 (2+), 457 (3+) | D    | 1368             | 263630747   |
| En <sub>37-44</sub> -Pos5 | 19.95                 | 1401 (1+), 701 (2+), 468 (3+) | F    | 1400             | 146132070   |
| En <sub>37-44</sub> -Pos5 | 20.428                | 1325 (1+), 663 (2+), 442 (3+) | A    | 1324             | 155,755,912 |
| En <sub>37-44</sub> -Pos5 | 20.428                | 1383 (1+), 692 (2+), 462 (3+) | E    | 1382             | 182549603   |
| En <sub>37-44</sub> -Pos5 | 21.645                | 1357 (1+), 679 (2+), 453 (3+) | C    | 1356             | 290,882,708 |
| En <sub>37-44</sub> -Pos5 | 22.053                | 1351 (1+), 676 (2+), 451 (3+) | P    | 1350             | 127889034   |
| En <sub>37-44</sub> -Pos5 | 23.372                | 1353 (1+), 677 (2+), 452 (3+) | V    | 1,352            | 31907686    |
| En <sub>37-44</sub> -Pos5 | 23.372                | 678 (2+)                      | T    | 1354             | 9682905     |
| En <sub>37-44</sub> -Pos5 | 24.144                | 1417 (1+), 709 (2+), 473 (3+) | Y    | 1416             | 184219831   |
| En <sub>37-44</sub> -Pos5 | 24.658                | 1385 (1+), 693 (2+), 462 (3+) | M    | 1384             | 76445569    |
| En <sub>37-44</sub> -Pos5 | 25.993                | 1367 (1+), 684 (2+), 456 (3+) | I, L | 1366             | 19483118    |
| En <sub>37-44</sub> -Pos5 | 26.851                | 1367 (1+), 684 (2+), 456 (3+) | I, L | 1366             | 144202744   |
| En <sub>37-44</sub> -Pos5 | 27.382                | 1401 (1+), 701 (2+), 468 (3+) | F    | 1400             | 189682935   |
| En <sub>37-44</sub> -Pos5 | 29.04                 | 1440 (1+), 721 (2+), 481 (3+) | W    | 1439             | 153300993   |
| AH1-Pos1                  | 19.766                | 791(2+)                       | K    | 1580             | 35547329    |
| AH1-Pos1                  | 19.766                | 795(2+)                       | H    | 1588             | 92051659    |
| AH1-Pos1                  | 19.766                | 1581 (1+), 791(2+), 527 (3+)  | E    | 1580             | 44592330    |
| AH1-Pos1                  | 20.15                 | 763(2+)                       | A    | 1523             | 25150497    |
| AH1-Pos1                  | 20.15                 | 1510 (1+), 755 (2+), 504 (3+) | G    | 1509             | 112660467   |
| AH1-Pos1                  | 20.15                 | 791(2+)                       | Q    | 1579             | 53824617    |
| AH1-Pos1                  | 20.15                 | 805(2+)                       | R    | 1608             | 14497409    |
| AH1-Pos1                  | 20.15                 | 771(2+)                       | S    | 1539             | 34471761    |
| AH1-Pos1                  | 20.15                 | 777(2+)                       | V    | 1551             | 891411      |
| AH1-Pos1                  | 20.15                 | 1555 (1+), 778 (2+), 519 (3+) | C    | 1555             | 119284960   |
| AH1-Pos1                  | 22.947                | 1552 (1+), 776 (2+), 518 (3+) | T    | 1553             | 9366602     |
| AH1-Pos1                  | 23.331                | 1615 (1+), 808 (2+), 539 (3+) | Y    | 1615             | 40892550    |
| AH1-Pos1                  | 23.715                | 1583 (1+), 792 (2+), 528 (3+) | M    | 1583             | 27104761    |
| AH1-Pos1                  | 24.487                | 1565 (1+), 783 (2+), 522 (3+) | N    | 1565             | 135462      |
| AH1-Pos1                  | 25.144                | 1565 (1+), 783 (2+), 523 (3+) | L, I | 1565, 1564       | 182607891   |
| AH1-Pos1                  | 25.144                | 784(2+)                       | D    | 1566             | 71234179    |
| AH1-Pos1                  | 26.132                | 1599 (1+), 800 (2+), 534 (3+) | F    | 1599             | 32280677    |
| AH1-Pos1                  | 27.174                | 1639 (1+), 820 (2+), 547 (3+) | W    | 1638             | 58459667    |
| AH1-Pos3                  | 19.489                | 1581 (1+), 791 (2+), 572 (3+) | K    | 1580             | 36246274    |
| AH1-Pos3                  | 19.489                | 1590 (1+), 795 (2+), 530 (3+) | H    | 1588             | 52976797    |

|          |        |                               |      |       |           |
|----------|--------|-------------------------------|------|-------|-----------|
| AH1-Pos3 | 19.983 | 1509 (1+), 755 (2+), 504 (3+) | G    | 1509  | 38221048  |
| AH1-Pos3 | 19.983 | 1566 (1+), 784 (2+), 523 (3+) | D    | 1,566 | 49355197  |
| AH1-Pos3 | 19.983 | 1608 (1+), 805 (2+), 537 (3+) | R    | 1608  | 37579640  |
| AH1-Pos3 | 20.477 | 1539 (1+), 770 (2+), 514 (3+) | S    | 1539  | 23905901  |
| AH1-Pos3 | 20.477 | 1580 (1+), 791 (2+), 527 (3+) | Q    | 1579  | 28975203  |
| AH1-Pos3 | 20.477 | 1599 (1+), 800 (2+), 534 (3+) | F    | 1599  | 8152448   |
| AH1-Pos3 | 20.918 | 1523 (1+), 762 (2+), 508 (3+) | A    | 1523  | 51684365  |
| AH1-Pos3 | 20.918 | 1549 (1+), 775 (2+), 517 (3+) | P    | 1549  | 12776902  |
| AH1-Pos3 | 20.918 | 1567 (1+), 784 (2+), 523 (3+) | D    | 1566  | 157540361 |
| AH1-Pos3 | 20.918 | 1581 (1+), 791 (2+), 528 (3+) | E    | 1580  | 77398174  |
| AH1-Pos3 | 22.016 | 779(2+)                       | C    | 1555, | 105995568 |
| AH1-Pos3 | 22.016 | 1555 (1+), 778 (2+), 519 (3+) | T    | 1553  | 221084116 |
| AH1-Pos3 | 22.837 | 777(2+)                       | T    | 1553  | 4300892   |
| AH1-Pos3 | 22.837 | 1551 (1+), 776 (2+), 518 (3+) | V    | 1,551 | 19200301  |
| AH1-Pos3 | 23.388 | 1615 (1+), 808 (2+), 539 (3+) | Y    | 1615  | 49876713  |
| AH1-Pos3 | 23.388 | 1584 (1+), 792 (2+), 529 (3+) | M    | 1583  | 14222197  |
| AH1-Pos3 | 24.54  | 1566 (1+), 783 (2+), 523 (3+) | N    | 1,565 | 6122778   |
| AH1-Pos3 | 24.54  | 1565 (1+), 783 (2+), 523 (3+) | I    | 1564  | 86043933  |
| AH1-Pos3 | 24.54  | 784 (2+)                      | L    | 1564  | 71234179  |
| AH1-Pos3 | 27.725 | 1638 (1+), 820 (2+), 547 (3+) | W    | 1638  | 118413841 |
| AH1-Pos5 | 16.855 | 1497 (1+), 749 (2+), 500 (3+) | G    | 1497  | 123300827 |
| AH1-Pos5 | 16.855 | 1527 (1+), 764 (2+), 510 (3+) | S    | 1528  |           |
| AH1-Pos5 | 16.855 | 785(2+)                       | K    | 1569  | 192556994 |
| AH1-Pos5 | 16.855 | 785(2+)                       | Q    | 1569  | 196250189 |
| AH1-Pos5 | 16.855 | 1577 (1+), 789 (2+), 526 (3+) | H    | 1577  | 128358085 |
| AH1-Pos5 | 16.855 | 1587 (1+), 794 (2+), 530 (3+) | F    | 1588  | 221666366 |
| AH1-Pos5 | 16.855 | 1596 (1+), 799 (2+), 533 (3+) | R    | 1597  | 157489852 |
| AH1-Pos5 | 18.337 | 1511 (1+), 756 (2+), 504 (3+) | A    | 1511  | 87040717  |
| AH1-Pos5 | 18.337 | 1527 (1+), 764 (2+), 510 (3+) | S    | 1528  | 78168203  |
| AH1-Pos5 | 18.337 | 1541 (1+), 771 (2+), 514 (3+) | W    | 1,540 | 5208793   |
| AH1-Pos5 | 18.337 | 779(2+)                       | D    | 1,555 | 85580867  |
| AH1-Pos5 | 18.337 | 1555 (1+), 778 (2+), 519 (3+) | N    | 1,554 | 147850158 |
| AH1-Pos5 | 18.337 | 1569 (1+), 785 (2+), 524 (3+) | E    | 1,568 | 29158895  |
| AH1-Pos5 | 19.215 | 1537 (1+), 769 (2+), 513 (3+) | P    | 1537  | 66235240  |
| AH1-Pos5 | 19.709 | 773                           | T    | 1542  | 89665213  |
| AH1-Pos5 | 19.709 | 1543 (1+), 772 (2+), 515 (3+) | C    | 1543  | 205657263 |
| AH1-Pos5 | 20.534 | 1539 (1+), 770 (2+), 514 (3+) | V    | 1539  | 103906082 |
| AH1-Pos5 | 20.534 | 787 (2+)                      | M    | 1571  | 3114580   |
| AH1-Pos5 | 21.743 | 1603 (1+), 802 (2+), 535 (3+) | Y    | 1604  | 191721914 |
| AH1-Pos5 | 23.058 | 1553 (1+), 777 (2+), 518 (3+) | I, L | 1,553 | 41309976  |
| AH1-Pos5 | 24.43  | 1587 (1+), 794 (2+), 530 (3+) | F    | 1588  | 138967104 |
| AH1-Pos5 | 25.581 | 1626 (1+), 814 (2+), 543 (3+) | W    | 1627  | 477275715 |
| AH1-Pos8 | 18.995 | 1539 (1+), 770 (2+), 514 (3+) | K    | 1,539 | 45312581  |
| AH1-Pos8 | 19.599 | 1548 (1+), 775 (2+), 517 (3+) | H    | 1548  | 119661122 |
| AH1-Pos8 | 19.599 | 1567 (1+), 784 (2+), 523 (3+) | R    | 1567  | 57101274  |
| AH1-Pos8 | 20.203 | 1468 (1+), 735 (2+), 490 (3+) | G    | 1468  | 210562395 |
| AH1-Pos8 | 20.203 | 1498 (1+), 750 (2+), 500 (3+) | S    | 1498  | 148067561 |
| AH1-Pos8 | 20.203 | 1512 (1+), 757 (2+), 505 (3+) | T    | 1511  | 85624310  |

|          |        |                               |      |       |           |
|----------|--------|-------------------------------|------|-------|-----------|
| AH1-Pos8 | 20.203 | 1526 (1+), 763 (2+), 509 (3+) | N    | 1,525 | 312239940 |
| AH1-Pos8 | 20.203 | 772(2+)                       | M    | 1542  | 35862517  |
| AH1-Pos8 | 20.203 | 1539 (1+), 770 (2+), 514 (3+) | E    | 1,540 | 180611625 |
| AH1-Pos8 | 20.203 | 1558 (1+), 780 (2+), 520 (3+) | F    | 1558  | 263732949 |
| AH1-Pos8 | 21.849 | 1482 (1+), 742 (2+), 495 (3+) | A    | 1482  | 274748057 |
| AH1-Pos8 | 21.849 | 1508 (1+), 755 (2+), 503 (3+) | P    | 1508  | 180208011 |
| AH1-Pos8 | 21.849 | 1514 (1+), 758 (2+), 505 (3+) | C    | 1514  | 433965311 |
| AH1-Pos8 | 24.871 | 1574 (1+), 488 (2+), 525 (3+) | Y    | 1574  | 256520687 |
| AH1-Pos8 | 24.871 | 1510 (1+), 756 (2+), 504 (3+) | V    | 1510  | 43455764  |
| AH1-Pos8 | 27.394 | 1525 (1+), 763 (2+), 509 (3+) | I, L | 1,524 | 17379004  |
| AH1-Pos8 | 28.435 | 764(2+)                       | D    | 1526  | 26979268  |
| AH1-Pos8 | 28.435 | 1524 (1+), 763 (2+), 509 (3+) | I, L | 1,524 | 185028475 |
| AH1-Pos8 | 29.04  | 1558 (1+), 780 (2+), 520 (3+) | F    | 1558  | 278190170 |
| AH1-Pos8 | 29.864 | 1597 (1+), 799 (2+), 533 (3+) | W    | 1597  | 152600419 |

**Table S2. Env<sub>37-44</sub>-Pos5 peptides**

| Name                     | Sequence    | MHC allele        | NetMHC percentile | HPLC purity | Observed MW | Theoretical MW |
|--------------------------|-------------|-------------------|-------------------|-------------|-------------|----------------|
| Env <sub>37-44</sub> -A5 | HHHSPHQAFNL | H2-L <sup>d</sup> | 0.2               | 81.8        | 1324.2      | 1324.41        |
| Env <sub>37-44</sub> -R5 | HHHSPHQRFNL | H2-L <sup>d</sup> | 1.4               | 98.2        | 1408.8      | 1409.52        |
| Env <sub>37-44</sub> -N5 | HHHSPHQNFNL | H2-L <sup>d</sup> | 0.4               | 91          | 1367.1      | 1367.44        |
| Env <sub>37-44</sub> -D5 | HHHSPHQDFNL | H2-L <sup>d</sup> | 1.2               | 91.6        | 1368.3      | 1368.42        |
| Env <sub>37-44</sub> -C5 | HHHSPHQCFNL | H2-L <sup>d</sup> | 0.25              | 82.4        | 1356.3      | 1356.48        |
| Env <sub>37-44</sub> -Q5 | HHHSPHQFNL  | H2-L <sup>d</sup> | 0.5               | 76.2        | 1381.2      | 1381.46        |
| Env <sub>37-44</sub> -E5 | HHHSPHQEFNL | H2-L <sup>d</sup> | 1                 | 84.9        | 1382.1      | 1382.45        |
| Env <sub>37-44</sub> -G5 | HHHSPHQGFNL | H2-L <sup>d</sup> | 0.6               | 89.6        | 1310.1      | 1310.39        |
| Env <sub>37-44</sub> -H5 | HHHSPHQHFNL | H2-L <sup>d</sup> | 0.5               | 81.9        | 1390.2      | 1390.47        |
| Env <sub>37-44</sub> -I5 | HHHSPHQIFNL | H2-L <sup>d</sup> | 0.4               | 85.6        | 1366.2      | 1366.49        |
| Env <sub>37-44</sub> -L5 | HHHSPHQLFNL | H2-L <sup>d</sup> | 0.7               | 86.1        | 1366.2      | 1366.49        |
| Env <sub>37-44</sub> -K5 | HHHSPHQKFNL | H2-L <sup>d</sup> | 0.9               | 98.7        | 1381.2      | 1381.51        |
| Env <sub>37-44</sub> -M5 | HHHSPHQMFNL | H2-L <sup>d</sup> | 0.3               | 82.1        | 1384.2      | 1384.53        |
| Env <sub>37-44</sub> -F5 | HHHSPHQFFNL | H2-L <sup>d</sup> | 0.6               | 89.3        | 1400.1      | 1400.51        |
| Env <sub>37-44</sub> -P5 | HHHSPHQPFNL | H2-L <sup>d</sup> | 1                 | 81.8        | 1350.3      | 1350.45        |
| Env <sub>37-44</sub> -S5 | HHHSPHQSFNL | H2-L <sup>d</sup> | 0.3               | 88.1        | 1340.1      | 1340.41        |
| Env <sub>37-44</sub> -T5 | HHHSPHQTFNL | H2-L <sup>d</sup> | 0.7               | 72.1        | 1354.2      | 1354.44        |
| Env <sub>37-44</sub> -W5 | HHHSPHQWFNL | H2-L <sup>d</sup> | 0.5               | 88.7        | 1439.1      | 1439.55        |
| Env <sub>37-44</sub> -Y5 | HHHSPHQYFNL | H2-L <sup>d</sup> | 0.4               | 77.7        | 1416        | 1416.51        |
| Env <sub>37-44</sub> -V5 | HHHSPHQVFNL | H2-L <sup>d</sup> | 0.5               | 95.2        | 1351.8      | 1352.47        |
